# Supplementary material
Source: ML conference proceedings conference paper supplement (https://openaccess.thecvf.com/content/WACV2023/html/Chen_More_Than_Just_WACV_2023_paper.html)
Supplement: Supplementary file 1 [file Chen_More_Than_Just_WACV_2023_supplemental.pdf]

# More Than Just Attention: Improving Cross-Modal Attentions with Contrastive Constraints for Image-Text Matching (Supplementary Material)

Yuxiao Chen<sup>1</sup>, Jianbo Yuan<sup>2</sup>, Long Zhao<sup>1</sup>, Tianlang Chen<sup>2</sup>, Rui Luo<sup>2</sup>, Larry Davis<sup>2</sup>, Dimitris N. Metaxas<sup>1</sup>

<sup>1</sup>Rutgers University, <sup>2</sup>Amazon.com Services, Inc

## 1. Implementation Details

**SCAN and PFAN.** These two methods separately train the text-to-image attention models where words are query fragments, and the image-to-text attention models where image regions are query fragments. When training the text-to-image attention models, we randomly sample one word fragment from each matched image-text pair to apply the proposed constraints. The image-to-text attention models are trained in a similar way by sampling image fragments.

**BFAN.** The method jointly trains the text-to-image and image-to-text attention models. In order to jointly supervise both attention models and reduce computation cost, for each matched image-text pair, we apply our constraints to either a sampled word fragment for the text-to-image attention model or a sampled image region for the image-to-text attention model with a probability of 50%.

**SGRAF.** This approach has a text-to-image attention model to learn the alignment between words and regions. We randomly sample one word fragment from each matched image-text pair to apply the proposed constraints.

## 2. Additional Attention Evaluation Results

**Quantitative Analysis.** To demonstrate the influence of different  $T_{IoU}$  on Attention Precision, Attention Recall, and Attention F1-Score, we report the results when  $T_{IoU}$  is set to 0.6 on Table 1 and Figure 1. We can observe similar performance improvements as when  $T_{IoU}$  is set to 0.4 (shown in the main paper). It demonstrates that the proposed constraints achieve consistently better results than baseline methods when different  $T_{IoU}$  values are chosen.

**Qualitative Analysis.** We report three cases of BFAN and SGRAF trained on the Flickr30K (see Figure 2 and 4) and MS-COCO dataset (see Figure 3 and 5). We find that the attention models trained with the proposed constraints can assign attention weights more accurately than the correspondent baselines across different datasets.

| Method      | Attention Precision | Attention Recall | Attention F1-Score |
|-------------|---------------------|------------------|--------------------|
| SCAN        | 16.88               | 47.40            | 22.88              |
| + CCR       | 18.87               | <b>49.96</b>     | 25.05              |
| + CCS       | 20.30               | 48.58            | 26.22              |
| + CCR & CCS | <b>21.31</b>        | 47.15            | <b>26.80</b>       |
| BFAN        | 27.50               | 46.52            | 31.92              |
| + CCR       | 30.17               | 48.72            | 34.49              |
| + CCS       | 29.55               | 46.97            | 33.55              |
| + CCR & CCS | <b>30.24</b>        | <b>49.20</b>     | <b>34.69</b>       |
| SGRAF       | 25.93               | 47.93            | 31.23              |
| + CCR       | 27.13               | 48.49            | 32.27              |
| + CCS       | 28.24               | 48.31            | 33.08              |
| + CCR & CCS | <b>28.94</b>        | <b>49.20</b>     | <b>33.94</b>       |

Table 1: Attention Precision, Attention Recall, and Attention F1-Score (%) of the SCAN, BFAN, and SGRAF models trained on the Flickr30K dataset when  $T_{IoU}$  is 0.6.

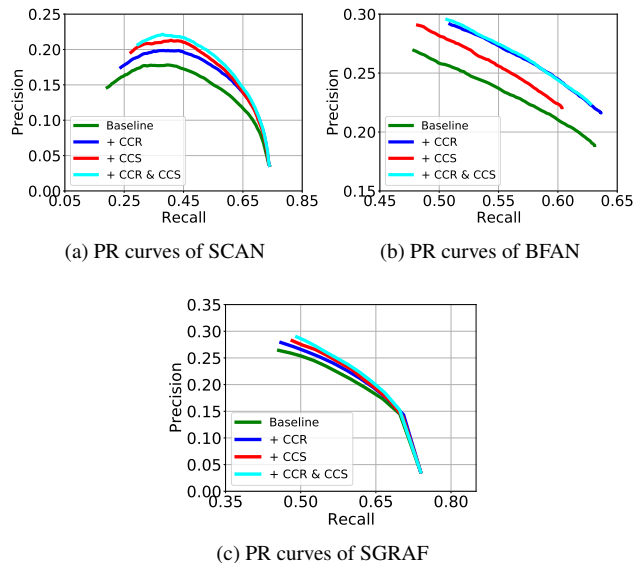

Figure 1: Attention PR curves of SCAN, BFAN, and SGRAF trained on the Flickr30K dataset when  $T_{IoU}$  is 0.6.

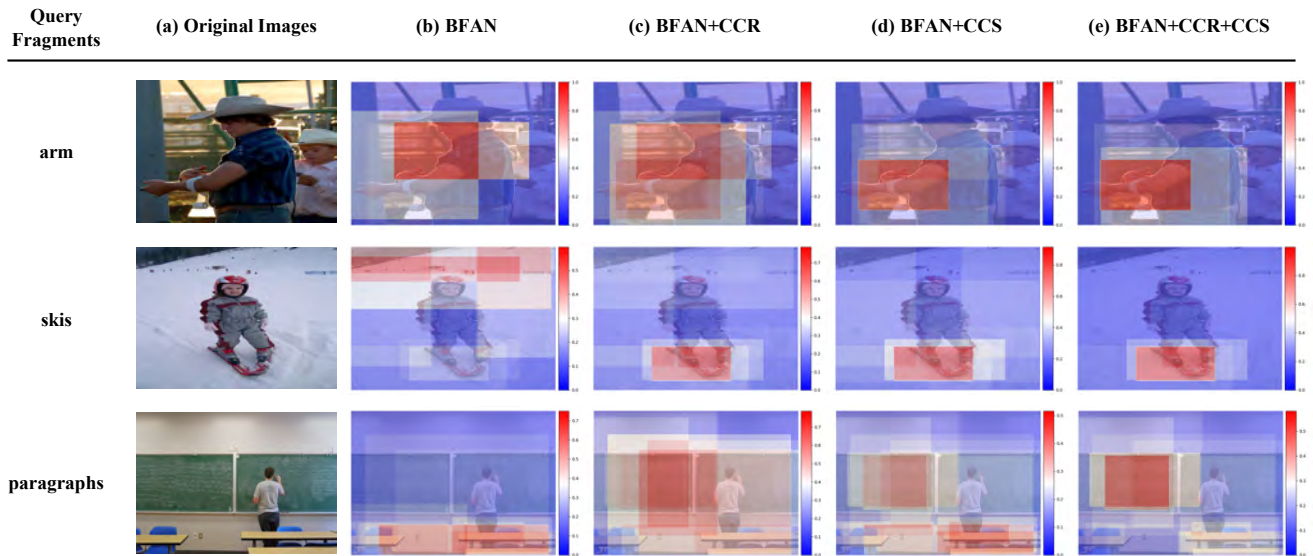

Figure 2: Examples of attended image regions with respect to the given words for the BFAN model on the Flickr30K dataset.

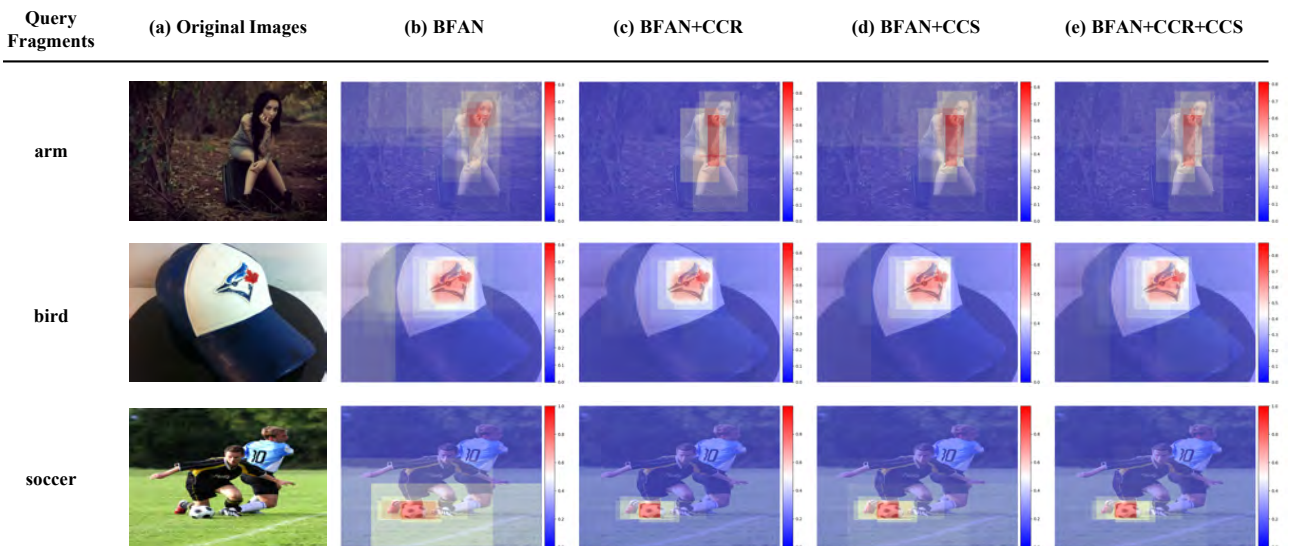

Figure 3: Examples of attended image regions with respect to the given words for the BFAN model on the MS-COCO dataset.

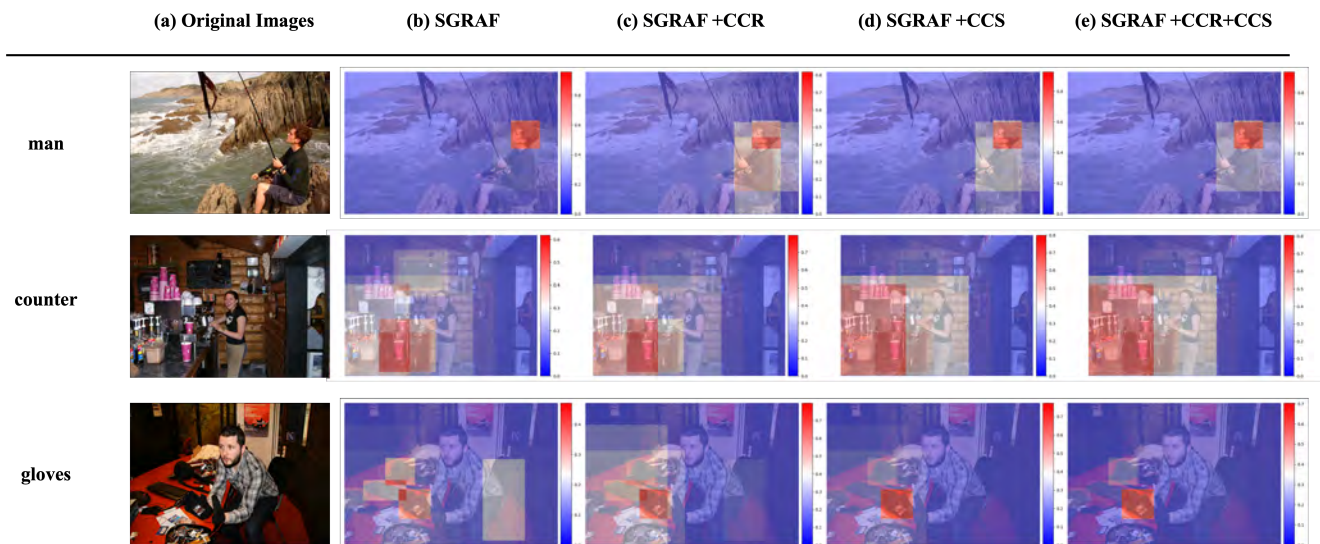

Figure 4: Examples of attended image regions with respect to the given words for the SGRAF model on the Flickr30K dataset.

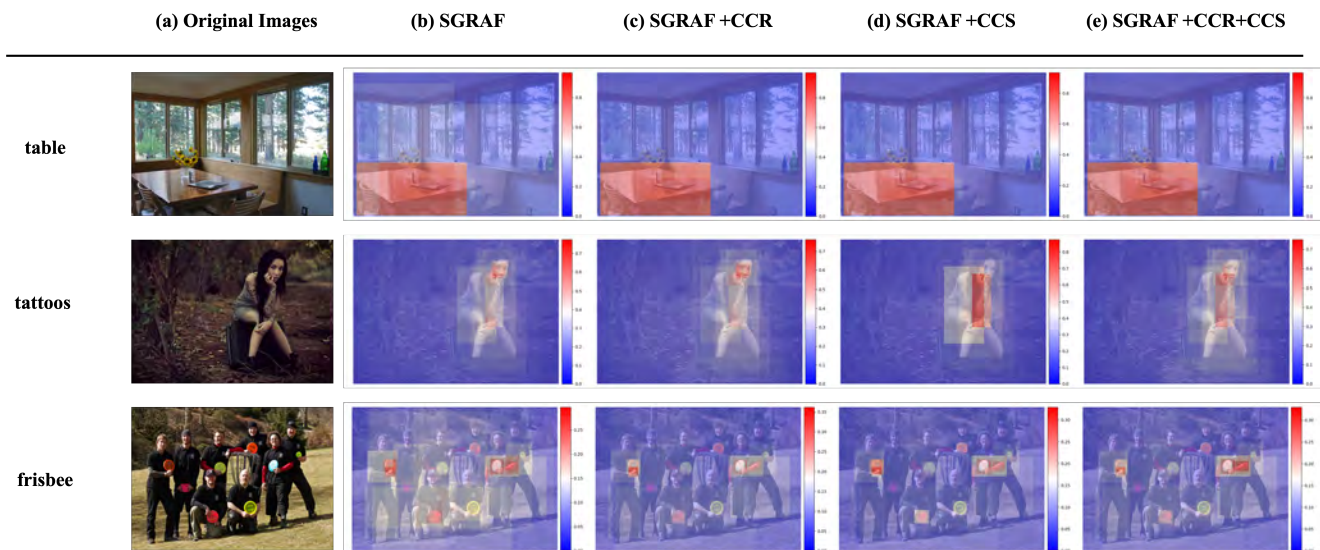

Figure 5: Examples of attended image regions with respect to the given words for the SGRAF model on the MS-COCO dataset.
